# Supplementary material for: In vivo and in vitro studies of [M(η6-pseudoerlotinib)2]+ sandwich complexes (M = Re, 99mTc)
Source: Royal Society of Chemistry journal article supplement (doi:10.1039/d3dt03011c), 2023-01-01
Supplement: d3dt03011c1.pdf [file d3dt03011c1.pdf]

***In vivo* and *in vitro* studies of  $[M(\eta^6\text{-pseudoerlotinib})_2]^+$  sandwich complexes (M = Re,  $^{99m}\text{Tc}$ )**

Federica Battistin<sup>a\*</sup>, Célia Fernandes<sup>b</sup>, Paula. D. Raposinho<sup>b</sup>, Olivier Blacque<sup>a</sup>, António Paulo<sup>b\*</sup>, Roger Alberto<sup>a</sup>

<sup>a</sup> Department of Chemistry, University of Zurich, Winterthurerstr. 190, 8057 Zurich, Switzerland. federica.battistin@chem.uzh.ch

<sup>b</sup> Centro de Ciências e Tecnologias Nucleares, Instituto Superior Técnico, Universidade de Lisboa, Campus Tecnológico e Nuclear, Bobadela, Portugal. apaulo@ctn.tecnico.ulisboa.pt

**Table of Contents:**

|                                                               |            |
|---------------------------------------------------------------|------------|
| <b>NMR spectra .....</b>                                      | <b>S3</b>  |
| <b>HR-ESI-MS spectra.....</b>                                 | <b>S8</b>  |
| <b><i>In vitro</i> stability of [<sup>99m</sup>Tc]1 .....</b> | <b>S11</b> |
| <b>X-ray crystallography .....</b>                            | <b>S12</b> |
| <b>Bibliography.....</b>                                      | <b>S14</b> |

## NMR spectra

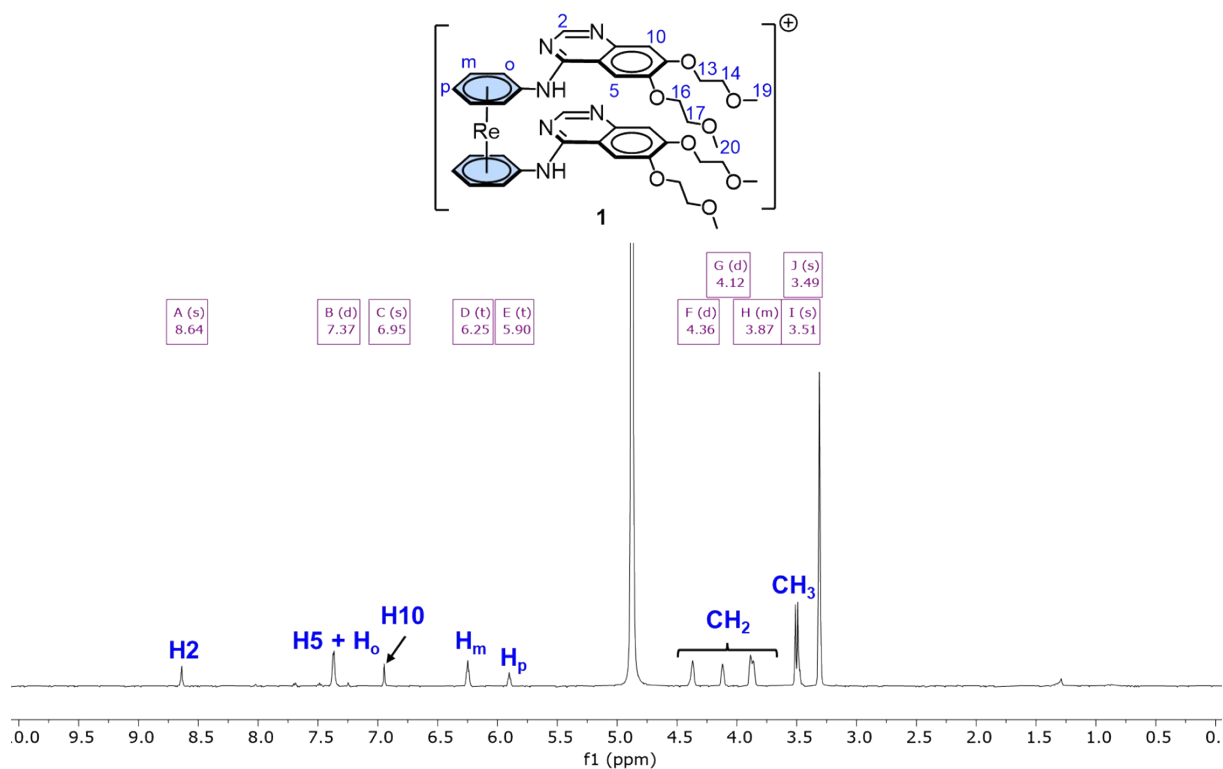

**Figure S1.**  $^1\text{H}$  NMR spectrum in  $\text{CD}_3\text{OD}$  of  $[\text{Re}(\eta^6\text{-pseudoerlotinib})_2]^+$  (1).

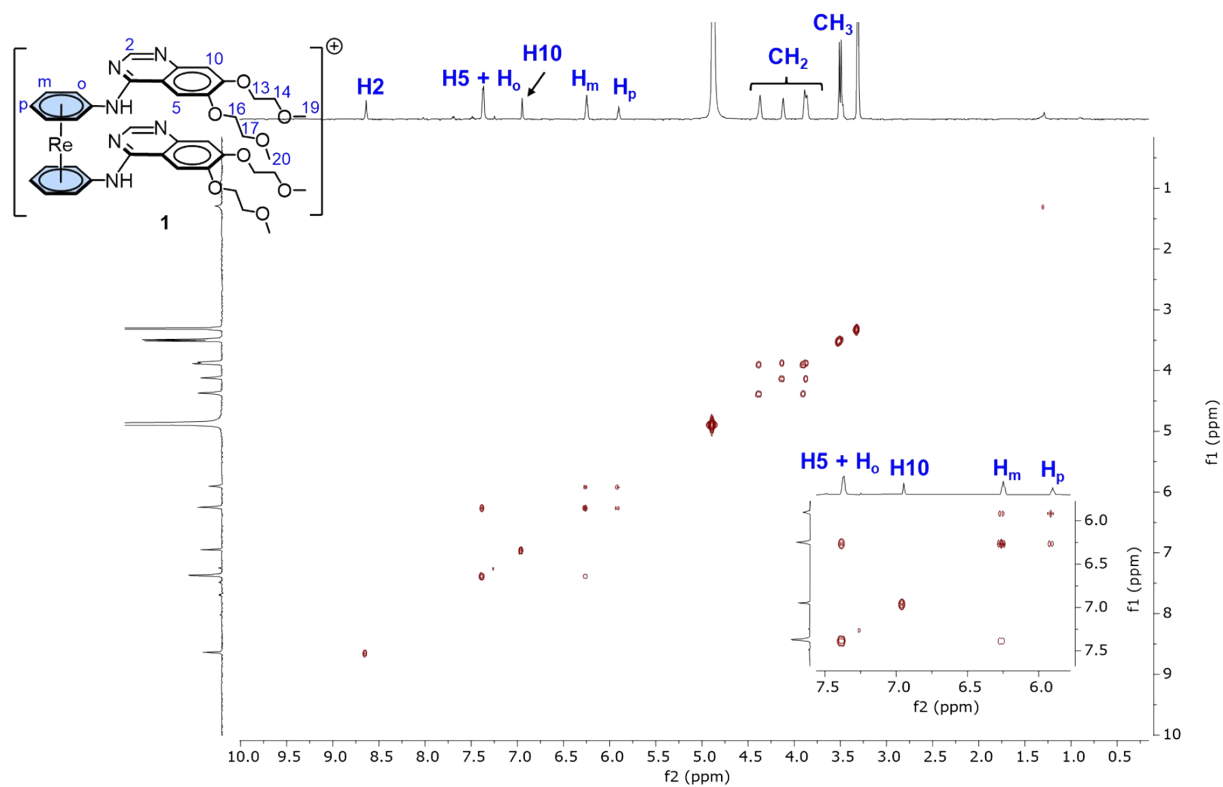

**Figure S2.**  $^1\text{H}$ - $^1\text{H}$  COSY spectrum in  $\text{CD}_3\text{OD}$  of  $[\text{Re}(\eta^6\text{-pseudoerlotinib})_2]^+$  (1).

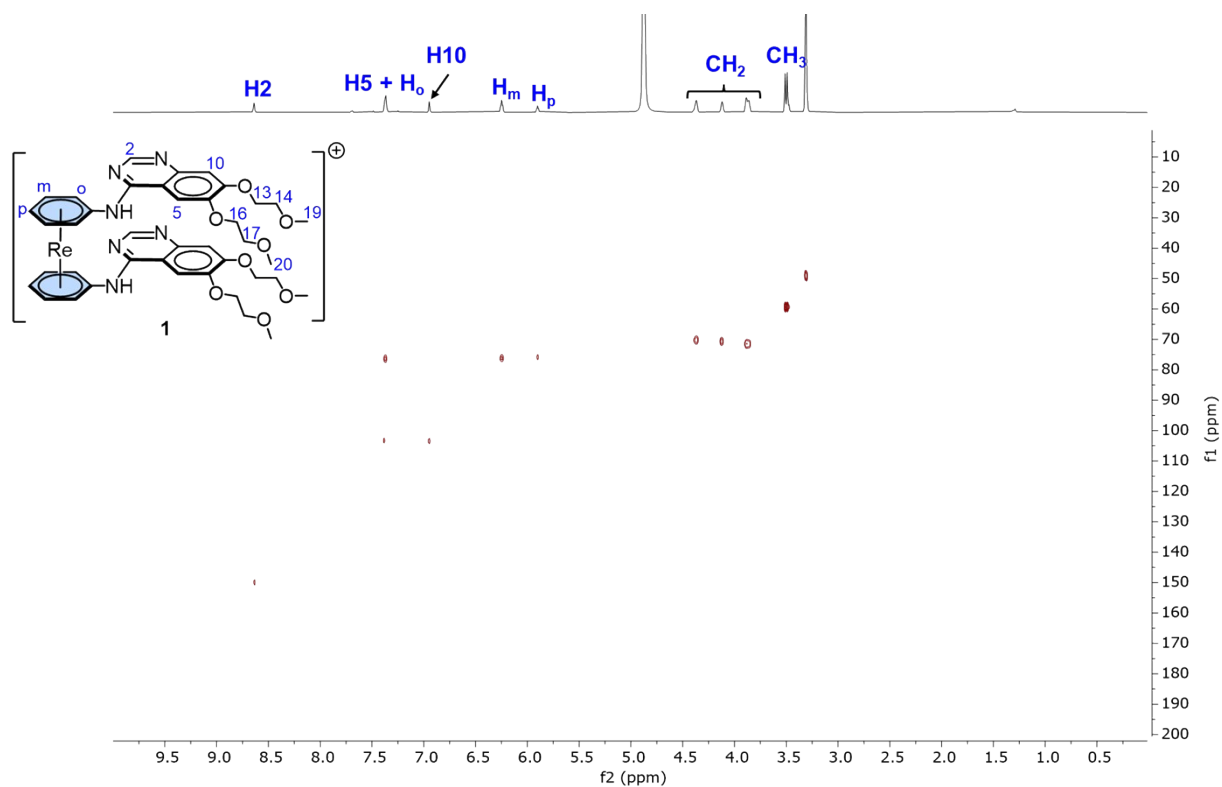

**Figure S3.**  $^1\text{H}$ - $^{13}\text{C}$  HSQC spectrum in  $\text{CD}_3\text{OD}$  of  $[\text{Re}(\eta^6\text{-pseudoerlotinib})_2]^+$  (**1**).

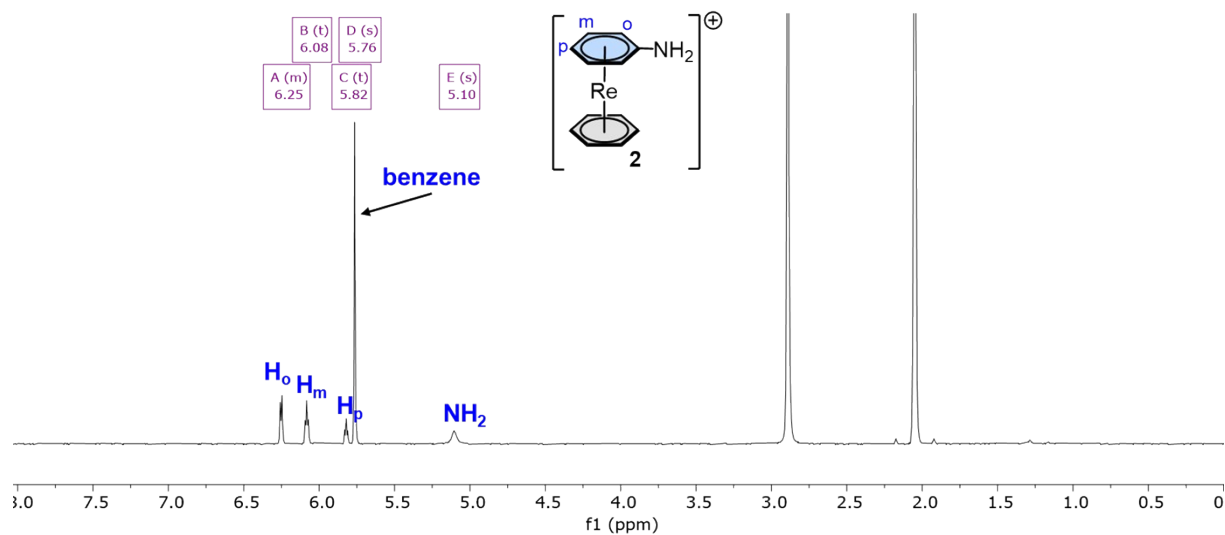

**Figure S4.**  $^1\text{H}$  NMR spectrum in  $\text{acetone-}d_6$  of  $[\text{Re}(\eta^6\text{-bz})(\eta^6\text{-aniline})]^+$  (**2**).

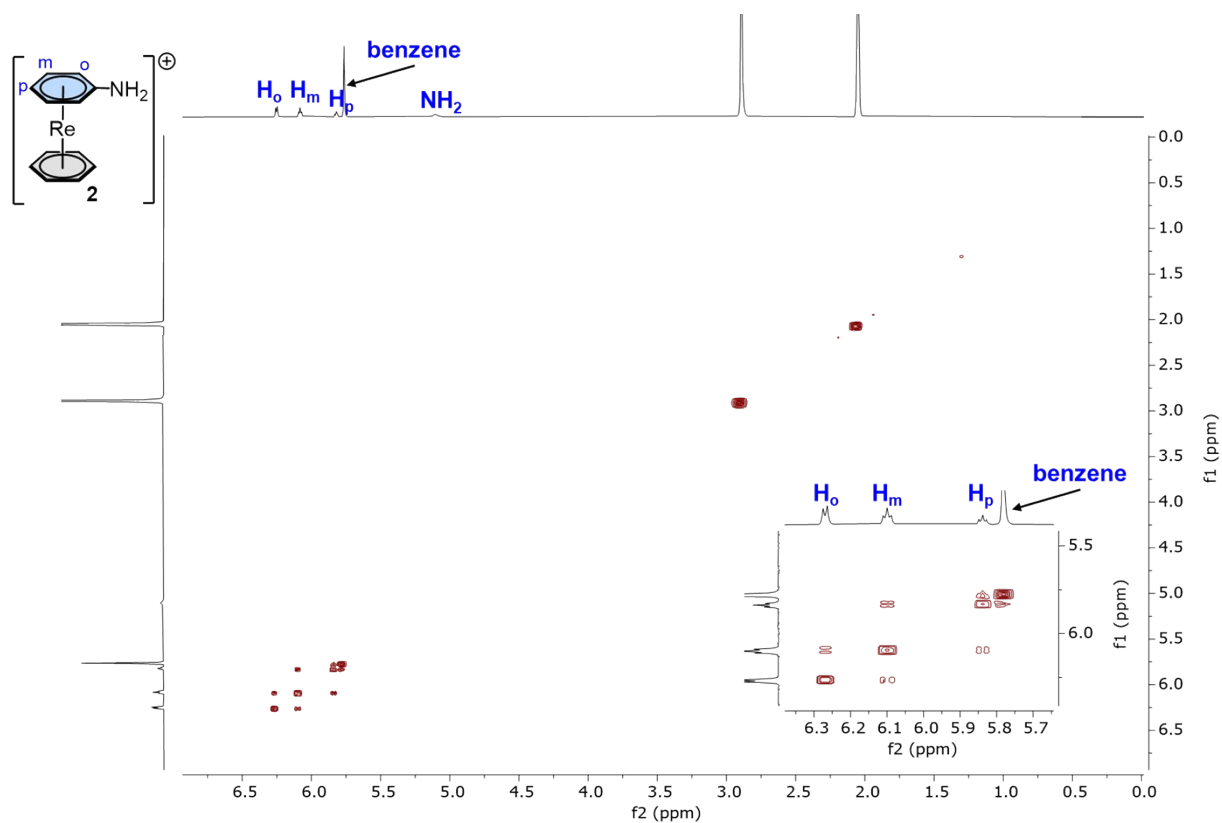

**Figure S5.**  $^1\text{H}$ - $^1\text{H}$  COSY spectrum in acetone- $d_6$  of  $[\text{Re}(\eta^6\text{-bz})(\eta^6\text{-aniline})]^+$  (**2**).

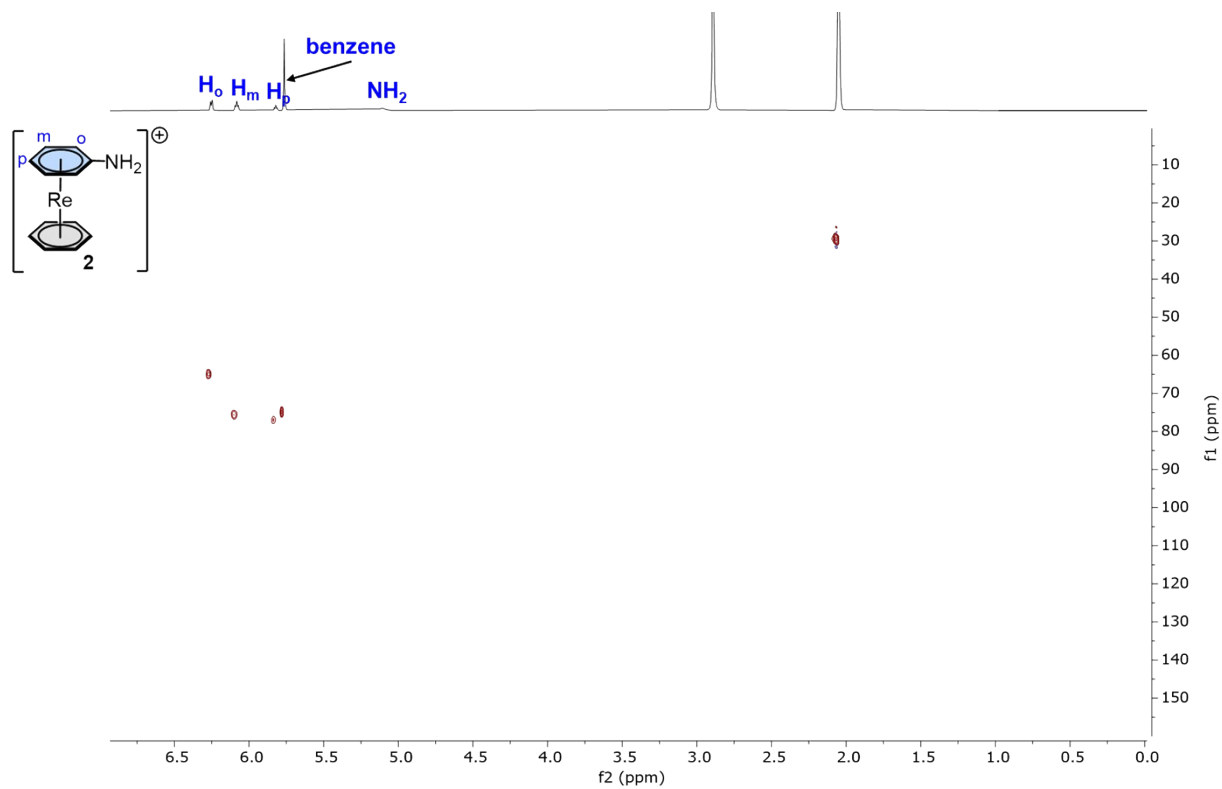

**Figure S6.**  $^1\text{H}$ - $^{13}\text{C}$  HSQC spectrum in acetone- $d_6$  of  $[\text{Re}(\eta^6\text{-bz})(\eta^6\text{-aniline})]^+$  (**2**).

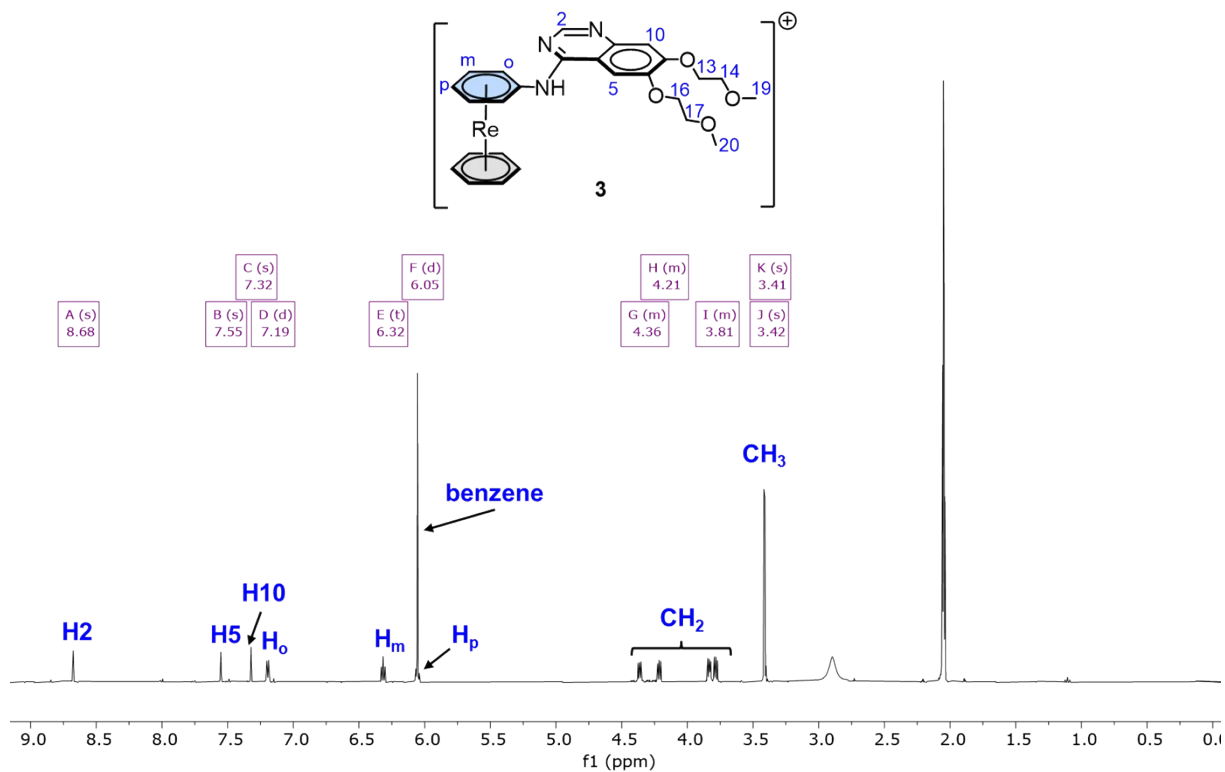

**Figure S7.**  $^1\text{H}$  NMR spectrum in acetone- $d_6$  of  $[\text{Re}(\eta^6\text{-bz})(\eta^6\text{-pseudoerlotinib})]^+$  (**3**).

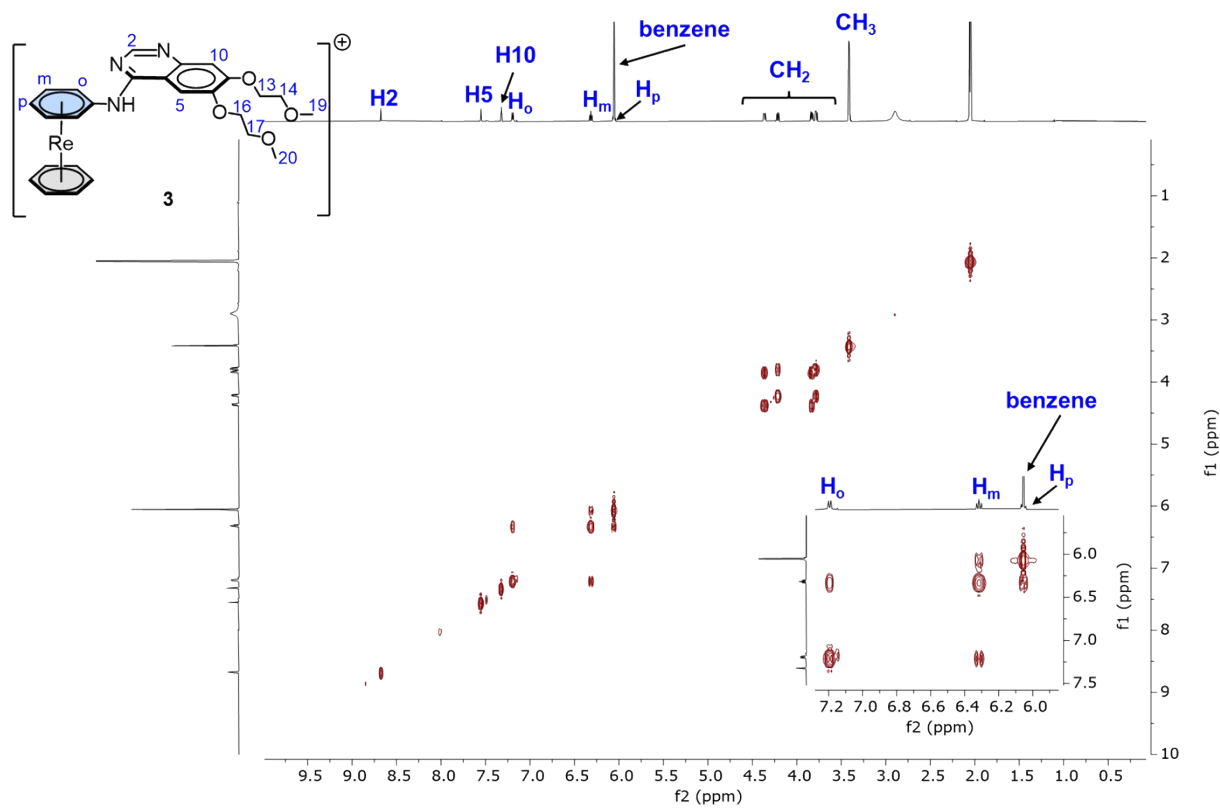

**Figure S8.**  $^1\text{H}$ - $^1\text{H}$  COSY spectrum in acetone- $d_6$  of  $[\text{Re}(\eta^6\text{-bz})(\eta^6\text{-pseudoerlotinib})]^+$  (**3**).

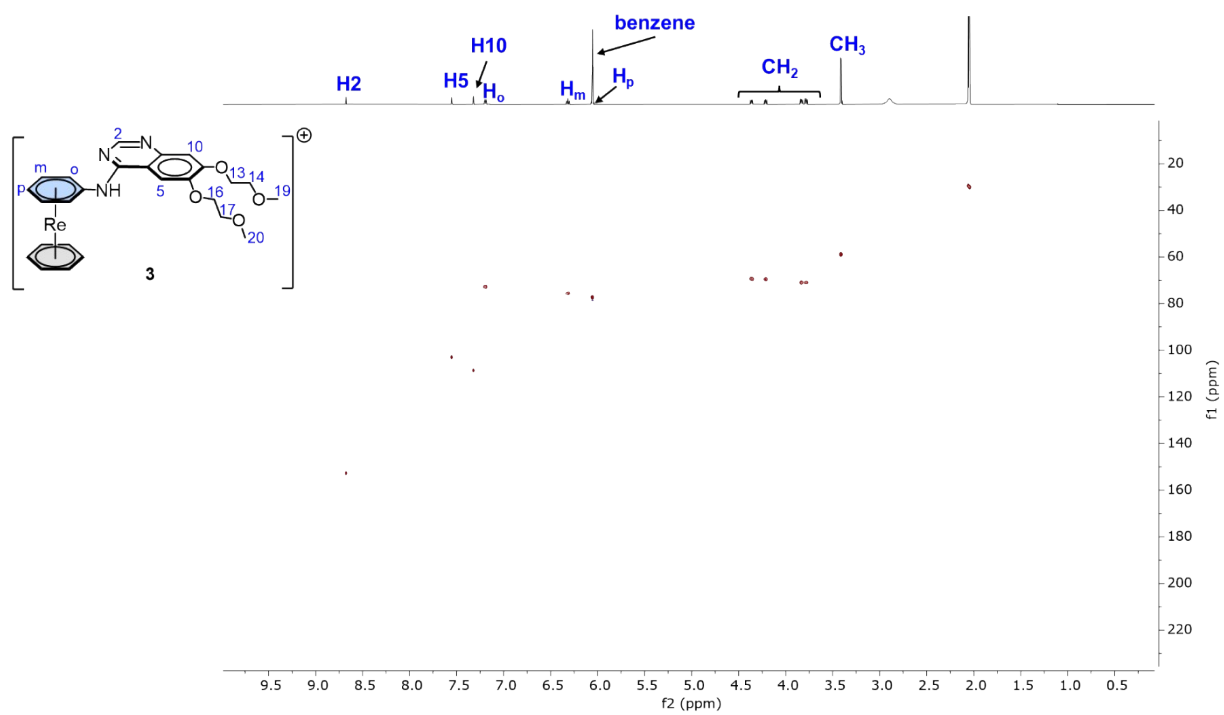

**Figure S9.**  $^1\text{H}$ - $^{13}\text{C}$  HSQC spectrum in acetone- $d_6$  of  $[\text{Re}(\eta^6\text{-bz})(\eta^6\text{-pseudoerlotinib})]^+$  (**3**).

# HR-ESI spectra

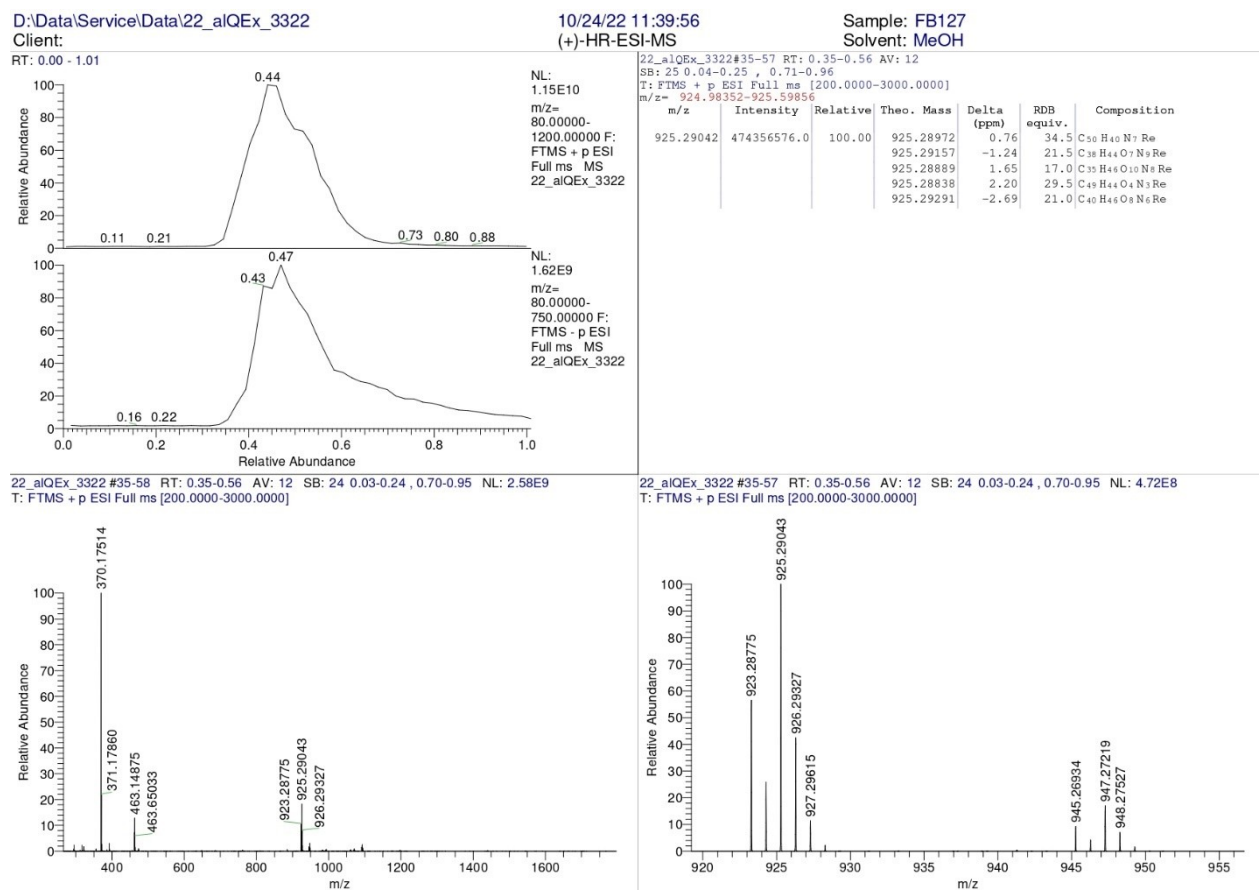

**Figure S10.** HR-ESI-MS spectrum of  $[\text{Re}(\eta^6\text{-pseudoerlotinib})_2]^+$  (**1**).



D:\Data\Service\Data\22\_aIQEx\_3299  
Client:

10/24/22 10:53:53  
(+)-HR-ESI-MS

Sample: FB123  
Solvent: MeOH

RT: 0.00 - 1.00

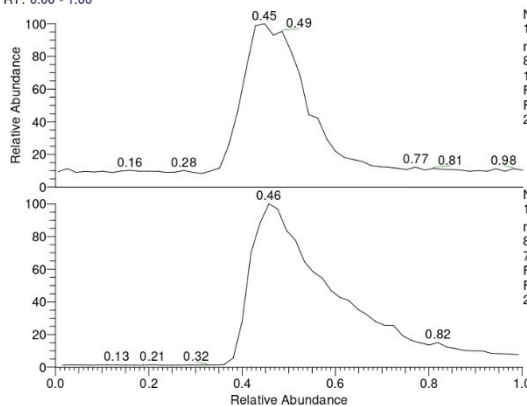

NL:  
1.23E10  
m/z=  
80.00000-  
1200.00000 F:  
FTMS + p ESI  
Full ms MS  
22\_aIQEx\_3299

22\_aIQEx\_3299#37-59 RT: 0.35-0.56 AV: 12  
SB: 25 0.03-0.24 , 0.70-0.94  
T: FTMS + p ESI Full ms [100.0000-1500.0000]  
m/z= 357.97477-358.16251

| m/z       | Intensity    | Relative | Theo. Mass | Delta (ppm) | RDB equiv. | Composition                                                      |
|-----------|--------------|----------|------------|-------------|------------|------------------------------------------------------------------|
| 358.06006 | 3566684416.0 | 100.00   | 358.06000  | 0.17        | 7.0        | C <sub>12</sub> H <sub>13</sub> NRe                              |
|           |              |          | 358.06053  | -1.32       | 2.5        | C <sub>5</sub> H <sub>12</sub> O <sub>2</sub> N <sub>4</sub> BRe |
|           |              |          | 358.05919  | 2.43        | 3.0        | C <sub>3</sub> H <sub>10</sub> ON <sup>+</sup> BRe               |

22\_aIQEx\_3299 #37-59 RT: 0.35-0.56 AV: 12 SB: 26 0.03-0.24 , 0.70-0.94 NL: 3.54E9  
T: FTMS + p ESI Full ms [100.0000-1500.0000]

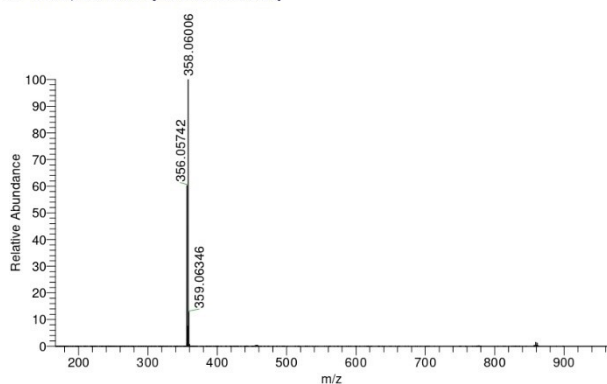

22\_aIQEx\_3299 #37-60 RT: 0.35-0.56 AV: 12 SB: 25 0.03-0.24 , 0.70-0.94 NL: 3.54E9  
T: FTMS + p ESI Full ms [100.0000-1500.0000]

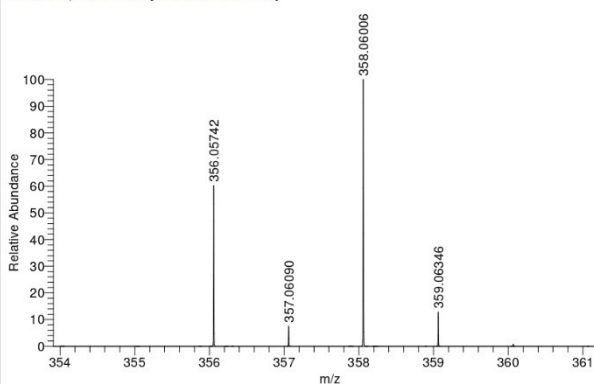

Figure S11. HR-ESI-MS spectrum of  $[\text{Re}(\eta^6\text{-bz})(\eta^6\text{-aniline})]^+$  (**2**).

D:\Data\Service\Data\22\_aIQEx\_3319  
Client:

10/24/22 11:33:52  
(+)-HR-ESI-MS

Sample: FB124  
Solvent: MeOH

RT: 0.00 - 1.00

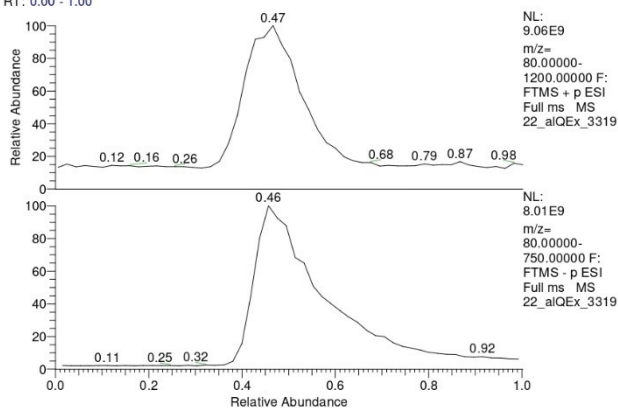

22\_aIQEx\_3319#37-61 RT: 0.35-0.58 AV: 13  
SB: 25 0.03-0.24 , 0.70-0.94  
T: FTMS + p ESI Full ms [100.0000-1500.0000]  
m/z= 633.92064-634.46847

| m/z       | Intensity   | Relative | Theo. Mass | Delta (ppm) | RDB equiv. | Composition                                                      |
|-----------|-------------|----------|------------|-------------|------------|------------------------------------------------------------------|
| 634.17143 | 490399584.0 | 100.00   | 634.17101  | 0.66        | 14.0       | C <sub>26</sub> H <sub>29</sub> O <sub>4</sub> N <sub>3</sub> Re |
|           |             |          | 634.17235  | -1.45       | 19.0       | C <sub>27</sub> H <sub>23</sub> N <sub>7</sub> Re                |
|           |             |          | 634.17235  | -1.46       | 13.5       | C <sub>28</sub> H <sub>31</sub> O <sub>3</sub> Re                |
|           |             |          | 634.16967  | 2.78        | 14.5       | C <sub>24</sub> H <sub>27</sub> O <sub>3</sub> N <sub>6</sub> Re |

22\_aIQEx\_3319 #37-61 RT: 0.35-0.58 AV: 13 SB: 24 0.03-0.24 , 0.70-0.95 NL: 1.49E9  
T: FTMS + p ESI Full ms [100.0000-1500.0000]

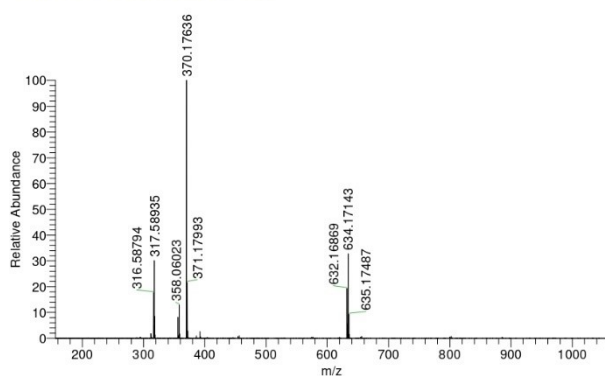

22\_aIQEx\_3319 #37-61 RT: 0.35-0.58 AV: 13 SB: 24 0.03-0.24 , 0.70-0.95 NL: 4.89E8  
T: FTMS + p ESI Full ms [100.0000-1500.0000]

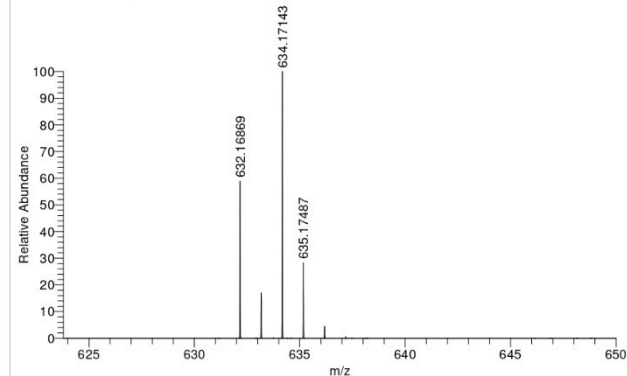

**Figure S12.** HR-ESI-MS spectrum of  $[\text{Re}(\eta^6\text{-bz})(\eta^6\text{-pseudoerlotinib})]^+$  (**3**).

*in vitro* stability of [<sup>99m</sup>Tc]1

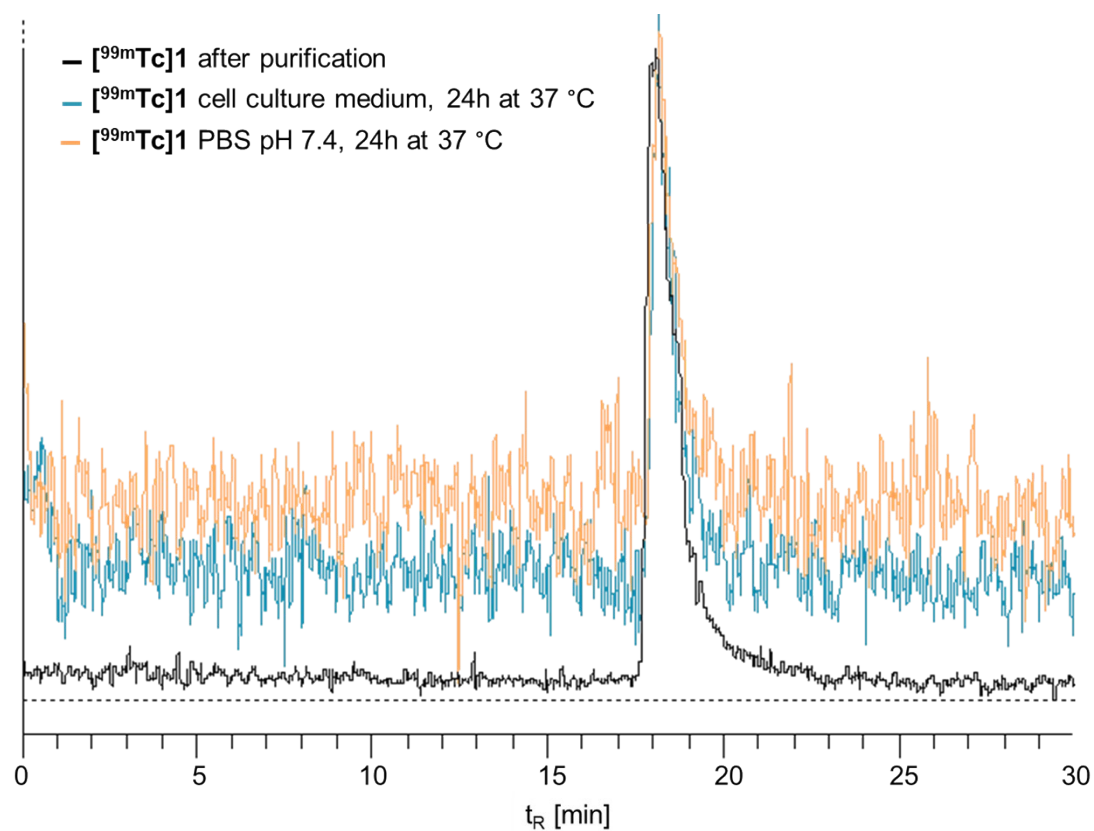

**Figure S13.**  $\gamma$ -traces of [<sup>99m</sup>Tc]1 after purification (black line), after incubation in cell culture medium for 24h at 37 °C (blue line), after incubation in PBS at pH 7.4 for 24h at 37 °C (blue line).

## X-ray crystallography

Single-crystal X-ray diffraction data of **1**, **2**, **3** were collected at 160(1) K on a Rigaku OD XtaLAB Synergy, Dualflex, Pilatus 200K diffractometer using a single wavelength X-ray source (Cu K $\alpha$  radiation:  $\lambda = 1.54184 \text{ \AA}$ ) using the copper X-ray radiation ( $\lambda = 1.54184 \text{ \AA}$ ) from a dual wavelength X-ray source and an Oxford Instruments Cryojet XL cooler. The selected suitable single crystal was mounted using polybutene oil on a flexible loop fixed on a goniometer head and immediately transferred to the diffractometer. Pre-experiment, data collection, data reduction and analytical absorption correction<sup>1</sup> were performed with the program suite CrysAlisPro.<sup>2</sup> Using Olex2,<sup>3</sup> the structure was solved with the SHELXT<sup>4</sup> small molecule structure solution program and refined with the SHELXL2018/3 program package<sup>5</sup> by full-matrix least-squares minimization on F<sup>2</sup>. PLATON<sup>6</sup> was used to check the result of the X-ray analysis. CCDC 2293185-2293187 contain the supplementary crystallographic data for this paper. These data are provided free of charge by The Cambridge Crystallographic Data Centre via [www.ccdc.cam.ac.uk/structures](http://www.ccdc.cam.ac.uk/structures).

**Table S1.** Crystal data and data collection of complexes [1](PF<sub>6</sub>)Cl<sub>2</sub>, [2](PF<sub>6</sub>), and [3](TFA).

|                                             | [Re( $\eta^6$ -pseudoerlotinib) <sub>2</sub> ]<br>(PF <sub>6</sub> )Cl <sub>2</sub> ·2(H <sub>2</sub> O)<br>([1]PF <sub>6</sub> Cl <sub>2</sub> ·2(H <sub>2</sub> O)) | [Re( $\eta^6$ -bz)( $\eta^6$ -aniline)]PF <sub>6</sub><br>([2]PF <sub>6</sub> ) | 4[Re( $\eta^6$ -bz)( $\eta^6$ -pseudoerlotinib)]<br>4(PF <sub>6</sub> )·2.25(H <sub>2</sub> O)·0.667(CH <sub>2</sub> Cl <sub>2</sub> )<br>(4[3](PF <sub>6</sub> )·2.25(H <sub>2</sub> O)·0.667(CH <sub>2</sub> Cl <sub>2</sub> )) |
|---------------------------------------------|-----------------------------------------------------------------------------------------------------------------------------------------------------------------------|---------------------------------------------------------------------------------|-----------------------------------------------------------------------------------------------------------------------------------------------------------------------------------------------------------------------------------|
| Empirical formula                           | C <sub>40</sub> H <sub>52</sub> Cl <sub>2</sub> F <sub>6</sub> N <sub>6</sub> O <sub>10</sub> PRE                                                                     | C <sub>12</sub> H <sub>13</sub> F <sub>6</sub> NPRE                             | C <sub>104.67</sub> H <sub>120.43</sub> Cl <sub>1.33</sub> F <sub>24</sub> N <sub>12</sub> O <sub>17.55</sub><br>P <sub>4</sub> Re <sub>4</sub>                                                                                   |
| Formula weight                              | 1178.94                                                                                                                                                               | 502.40                                                                          | 3199.22                                                                                                                                                                                                                           |
| Temperature/K                               | 160(1)                                                                                                                                                                | 160(1)                                                                          | 160.0(1)                                                                                                                                                                                                                          |
| Crystal system                              | triclinic                                                                                                                                                             | orthorhombic                                                                    | triclinic                                                                                                                                                                                                                         |
| Space group                                 | P-1                                                                                                                                                                   | Immm                                                                            | P-1                                                                                                                                                                                                                               |
| a/Å                                         | 11.06150(10)                                                                                                                                                          | 8.09180(10)                                                                     | 11.04098(7)                                                                                                                                                                                                                       |
| b/Å                                         | 13.8305(3)                                                                                                                                                            | 12.2476(2)                                                                      | 14.03029(9)                                                                                                                                                                                                                       |
| c/Å                                         | 16.0904(3)                                                                                                                                                            | 7.01550(10)                                                                     | 19.54390(14)                                                                                                                                                                                                                      |
| $\alpha$ /°                                 | 73.359(2)                                                                                                                                                             | 90                                                                              | 77.5660(6)                                                                                                                                                                                                                        |
| $\beta$ /°                                  | 71.7530(10)                                                                                                                                                           | 90                                                                              | 84.5485(6)                                                                                                                                                                                                                        |
| $\gamma$ /°                                 | 75.7690(10)                                                                                                                                                           | 90                                                                              | 83.5136(5)                                                                                                                                                                                                                        |
| Volume/Å <sup>3</sup>                       | 2206.68(7)                                                                                                                                                            | 695.272(17)                                                                     | 2929.77(4)                                                                                                                                                                                                                        |
| Z                                           | 2                                                                                                                                                                     | 2                                                                               | 1                                                                                                                                                                                                                                 |
| $\rho_{\text{calc}}/\text{cm}^3$            | 1.774                                                                                                                                                                 | 2.400                                                                           | 1.813                                                                                                                                                                                                                             |
| $\mu/\text{mm}^{-1}$                        | 7.636                                                                                                                                                                 | 18.792                                                                          | 9.607                                                                                                                                                                                                                             |
| F(000)                                      | 1184.0                                                                                                                                                                | 472.0                                                                           | 1571.0                                                                                                                                                                                                                            |
| Crystal size/mm <sup>3</sup>                | 0.15 × 0.04 × 0.03                                                                                                                                                    | 0.18 × 0.12 × 0.09                                                              | 0.15 × 0.09 × 0.01                                                                                                                                                                                                                |
| Radiation                                   | Cu K $\alpha$ ( $\lambda$ = 1.54184)                                                                                                                                  | Cu K $\alpha$ ( $\lambda$ = 1.54184)                                            | Cu K $\alpha$ ( $\lambda$ = 1.54184)                                                                                                                                                                                              |
| 2 $\theta$ range for data collection/°      | 5.94 to 148.998                                                                                                                                                       | 13.114 to 148.64                                                                | 7.15 to 149.004                                                                                                                                                                                                                   |
| Index ranges                                | -12 ≤ h ≤ 13, -17 ≤ k ≤ 17, -20 ≤ l ≤ 20                                                                                                                              | -10 ≤ h ≤ 9, -15 ≤ k ≤ 15, -8 ≤ l ≤ 8                                           | -13 ≤ h ≤ 13, -17 ≤ k ≤ 14, -23 ≤ l ≤ 24                                                                                                                                                                                          |
| Reflections collected                       | 46323                                                                                                                                                                 | 3744                                                                            | 61434                                                                                                                                                                                                                             |
| Independent reflections                     | 8981 [R <sub>int</sub> = 0.0251, R <sub>sigma</sub> = 0.0172]                                                                                                         | 436 [R <sub>int</sub> = 0.0280, R <sub>sigma</sub> = 0.0112]                    | 11918 [R <sub>int</sub> = 0.0237, R <sub>sigma</sub> = 0.0171]                                                                                                                                                                    |
| Data/restraints/parameters                  | 8981/0/627                                                                                                                                                            | 436/108/72                                                                      | 11918/409/832                                                                                                                                                                                                                     |
| Goodness-of-fit on F <sup>2</sup>           | 1.130                                                                                                                                                                 | 1.172                                                                           | 1.050                                                                                                                                                                                                                             |
| Final R indexes [I ≥ 2 $\sigma$ (I)]        | R <sub>1</sub> = 0.0287, wR <sub>2</sub> = 0.0690                                                                                                                     | R <sub>1</sub> = 0.0162, wR <sub>2</sub> = 0.0396                               | R <sub>1</sub> = 0.0293, wR <sub>2</sub> = 0.0755                                                                                                                                                                                 |
| Final R indexes [all data]                  | R <sub>1</sub> = 0.0292, wR <sub>2</sub> = 0.0692                                                                                                                     | R <sub>1</sub> = 0.0162, wR <sub>2</sub> = 0.0396                               | R <sub>1</sub> = 0.0306, wR <sub>2</sub> = 0.0764                                                                                                                                                                                 |
| Largest diff. peak/hole / e Å <sup>-3</sup> | 1.30/-1.61                                                                                                                                                            | 0.47/-0.70                                                                      | 1.09/-1.52                                                                                                                                                                                                                        |
| CCDC Nr.                                    | 2293186                                                                                                                                                               | 2293185                                                                         | 2293187                                                                                                                                                                                                                           |

## Bibliography:

- (1) Clark, R. C.; Reid, J. S. The Analytical Calculation of Absorption in Multifaceted Crystals. *Acta Crystallogr. Sect. A Found. Crystallogr.* **1995**, *51* (6), 887–897.
- (2) CrysAlisPro (version 1.171.42.57a). Rigaku Oxford Diffraction Ltd. Yarnton, Oxfordshire, England, 2022.
- (3) Dolomanov, O. V.; Bourhis, L. J.; Gildea, R. J.; Howard, J. A. K.; Puschmann, H. A Complete Structure Solution, Refinement and Analysis Program. *J. Appl. Crystallogr* **2009**, *42* (2), 339–341.
- (4) Sheldrick, G. M. SHELXT—Integrated Space-Group and Crystal-Structure Determination. *Acta Crystallogr. Sect. A Found. Adv.* **2015**, *71* (1), 3–8.
- (5) Sheldrick, G. M. Crystal Structure Refinement with SHELXL Sheldrick, G. M. (2015). Crystal Structure Refinement with SHELXL. *Acta Crystallographica Section C: Structural Chemistry*, *71*(1), 3–8. *Acta Crystallogr. Sect. C Struct. Chem.* **2015**, *71* (1), 3–8.
- (6) Spek, A. L. Structure Validation in Chemical Crystallography. *Acta Crystallogr. Sect. D Biol. Crystallogr.* **2009**, *65* (2), 148–155.
